# Supplementary material
Source: publisher site journal article supplement (https://www.degruyterbrill.com/publication/isbn/9783110894196/downloadAsset/9783110894196_Inhaltsverzeichnis.pdf)
Supplement: Supplementary file 1 [file 9783110894196_Inhaltsverzeichnis.pdf]

## Inhaltsverzeichnis

| Nr.                                                                                                                                                                   | Seite |
|-----------------------------------------------------------------------------------------------------------------------------------------------------------------------|-------|
| 1 Kopftuchverbot für muslimische Lehrerin im öffentl. Schuldienst. BVerwG, Urteil vom 4.7.2002 (2 C 21.01) .....                                                      | 1     |
| 2 Wegfall der Grundsteuerbefreiung für kirchl. Grundstücke bei Grundstücksaustausch. BFH, Urteil vom 10.7.2002 (II R 22/00) .....                                     | 6     |
| 3 Sozialhilfe für Kosten der Beschneidung eines muslim. Kindes. Niedersächsisches OVG, Beschluss vom 23.7.2002 (4 ME 336/02) .....                                    | 10    |
| 4 Eingruppierung freigestellter Arbeitnehmervertreter. LAG Baden-Württemberg, Urteil vom 24.7.2002 (2 Sa 20/02) .....                                                 | 12    |
| 5 Mitgliedschaft in israelitischer Kultusgemeinde. FG München, Urteil vom 30.7.2002 (13 K 4056/01) .....                                                              | 17    |
| 6 Unanwendbarkeit des BetrVG auf ein Diakonie-Krankenhaus. BAG, Beschluss vom 31.7.2002 (7 ABR 12/01) .....                                                           | 20    |
| 7 Betroffenheit eines ehemaligen kirchlichen Friedhofs durch einen Planfeststellungsbeschluss über Straßenland. OVG Saarland, Beschluss vom 6.8.2002 (2 U 3/02) ..... | 28    |
| 8 Staatl. Warnung vor sog. Jugendsekten. BVerfG, Nichtannahmebeschluss vom 12.8.2002 (1 BvR 1044/93) .....                                                            | 34    |
| 9 Unfallversicherungsschutz für Betreuer einer Jugendfreizeit. BSG, Urteil vom 13.8.2002 (B 2 U 5/02 R) .....                                                         | 37    |
| 10 Vordienstzeiten im Kirchendienst als ruhegehaltfähige Dienstzeiten. VG Hannover, Urteil vom 13.8.2002 (13 A 4008/00) .....                                         | 47    |
| 11 Ablehnung staatl. Kunstförderung für Scientology-Mitglied. BVerfG, Nichtannahmebeschluss vom 16.8.2002 (1 BvR 1241/97) .....                                       | 50    |
| 12 Kein Werbungskostenabzug eines Priesters für Zweitstudium der Pädagogik und für Pilgerreise. FG Münster, Urteil vom 16.8.2002 (4 K 7997/99 E) .....                | 55    |
| 13 Rechtsstaatliche Mindestanforderungen an die Kirchensteuererhebung. BVerfG, Nichtannahmebeschluss vom 19.8.2002 (2 BvR 443/01) ....                                | 62    |
| 14 Religiös begründete Ablehnung eines öffentlichen Ehrenamtes (hier: Wahlhelfer). OVG Nordrhein-Westfalen, Urteil vom 3.9.2002 (15 A 1676/00) .....                  | 71    |

|    |                                                                                                                                                                                                                                |     |
|----|--------------------------------------------------------------------------------------------------------------------------------------------------------------------------------------------------------------------------------|-----|
| 15 | Beweisanforderungen für Kirchenaustritt in der ehem. DDR. FG Nürnberg, Urteil vom 4.9.2002 (VI 338/2001) .....                                                                                                                 | 77  |
| 16 | Keine Anerkennung einer islamrechtlichen Privatscheidung bei Anwendung deutschen Rechts. BayObLG, Beschluss vom 12.9.2002 (3 Z BR 136/02) .....                                                                                | 82  |
| 17 | Wirksamwerden einer unvollständigen Kirchenaustrittserklärung. OLG Köln, Beschluss vom 18.9.2002 (16 Wx 165, 166/02) .....                                                                                                     | 87  |
| 18 | Kein Anspruch auf Heimunterricht für schulpflichtige Kinder aus religiösen oder weltanschaulichen Gründen. BayVGh, Beschluss vom 18.9.2002 (7 ZB 02.1701) .....                                                                | 91  |
| 19 | Vereinsrechtliche Arbeitspflichten, Rechtsweg. BAG, Beschluss vom 26.9.2002 (5 AZB 19/01) .....                                                                                                                                | 93  |
| 20 | Zwölfteilsregelung für Besteuerung eines im Jahr des Kirchenaustritts angefallenen Veräußerungsgewinns. FG München, Beschluss vom 9.10.2002 (13 V 3423/02) .....                                                               | 103 |
| 21 | Kündigung einer muslimischen Verkäuferin wegen Tragens eines Kopftuchs. BAG, Urteil vom 10.10.2002 (2 AZR 472/01) .....                                                                                                        | 104 |
| 22 | Unfallversicherungsschutz für Helferin beim Pfarrgemeindefest. BSG, Urteil vom 10.10.2002 (B 2 U 14/02 R) .....                                                                                                                | 112 |
| 23 | Sonderunterhalt für Kosten der Konfirmationsfeier. KG Berlin, Beschluss vom 15.10.2002 (19 WF 259/02) .....                                                                                                                    | 124 |
| 24 | Name eines religiösen Oberhauptes als unzulässige Marke. BPatG, Beschluss vom 16.10.2002 (24 W (pat) 140/01) .....                                                                                                             | 127 |
| 25 | Zulassung zum Studium an kirchl. Fachhochschule. VG Berlin, Beschluss vom 22.10.2002 (12 A 687.02) .....                                                                                                                       | 132 |
| 26 | Geltungsbereich des BetrVG, kath. Wohnungsbau- und Siedlungsgesellschaft. BAG, Beschluss vom 23.10.2002 (7 ABR 59/01) .....                                                                                                    | 135 |
| 27 | Straßenrechtliche Sondernutzungserlaubnis für Scientology-Veranstaltung. BayVGh, Beschluss vom 29.10.2002 (8 CE 02.2663) .....                                                                                                 | 142 |
| 28 | Versetzung eines ev. Pfarrers in den Ruhestand, Rechtsweg. BVerwG, Urteil vom 30.10.2002 (2 C 23.01) .....                                                                                                                     | 148 |
| 29 | Einstellung und Beendigung der Verfassungsstreitverfahren um die Einführung des Schulfachs LER in Brandenburg. BVerfG, Beschluss vom 31.10.2002 (1 BvF 1/96, 1 BvR 1697/96, 1 BvR 1718/96, 1 BvR 1783/96, 1 BvR 1412/97) ..... | 152 |

|    |                                                                                                                                                                                                                         |     |
|----|-------------------------------------------------------------------------------------------------------------------------------------------------------------------------------------------------------------------------|-----|
| 30 | Umfang staatl. Justizgewährungspflicht bei Disziplinarmaßnahmen im kirchl. Dienst. Hess.VGH, Beschluss vom 6.11.2002 (10 UZ 2439/00) .....                                                                              | 155 |
| 31 | Unrichtige Annahme eines Kirchenaustritts in einem Kirchensteuerbescheid. FG München, Beschluss vom 6.11.2002 (13 V 4469/02) ....                                                                                       | 160 |
| 32 | Gebühr für die Genehmigung eines Grundstückskaufvertrags. VG Weimar, Urteil vom 7.11.2002 (2 K 1581/01.We) .....                                                                                                        | 161 |
| 33 | Absenkung der Wartestandsbezüge eines Pfarrers. OVG Nordrhein-Westfalen, Beschluss vom 8.11.2002 (5 A 751/01) .....                                                                                                     | 164 |
| 34 | Passfoto einer zum Christentum konvertierten Muslima. VG Düsseldorf, Urteil vom 11.11.2002 (24 L 2529/02) .....                                                                                                         | 166 |
| 35 | Rechtsnachfolge in kirchl. Arbeitsverträge. BAG, Urteil vom 13.11.2002 (4 AZR 73/01) .....                                                                                                                              | 169 |
| 36 | Umzugskostenvergütung für kirchlichen Arbeitnehmer. LAG Hamm, Urteil vom 21.11.2002 (16 Sa 823/02) .....                                                                                                                | 178 |
| 37 | Unterschiedliche Behandlung glaubensverschiedener Ehegatten und Lebenspartner bei der Erhebung des besonderen Kirchgelds. FG Bremen, Urteil vom 22.11.2002 (1 K 307/02) .....                                           | 183 |
| 38 | Verbot des Vereins „Kalifatsstaat“. BVerwG, Urteil vom 27.11.2002 (6 A 4.02) .....                                                                                                                                      | 189 |
| 39 | Erstreckung des Vereinsverbots für den „Kalifatsstaat“ auf eine Teilorganisation. BVerwG, Urteil vom 27.11.2002 (6 A 1.02) .....                                                                                        | 202 |
| 40 | Vornamensänderung nach Übertritt zum Islam. VG Düsseldorf, Urteil vom 27.11.2002 (18 K 2105/02) .....                                                                                                                   | 207 |
| 41 | Zulage aufgrund betrieblicher Übung im kirchlichen Arbeitsverhältnis. LAG Düsseldorf, Urteil vom 27.11.2002 (12 Sa 1071/02) .....                                                                                       | 214 |
| 42 | Spende aus SED/PDS-Vermögen, treuhänderische Verwaltung gem. § 20b DDR-PartG 1990. EGMR, Nichtzulassungsbeschluss (decision) vom 5.12.2002 (Appl.No. 53871/00 [Islam. Religionsgemeinschaft e.V. ./ Deutschland]) ..... | 220 |
| 43 | Befreiung einer Jugendbildungsstätte von der Rundfunkgebührenpflicht. OVG Nordrhein-Westfalen, Beschluss vom 5.12.2002 (19 A 2778/00) .....                                                                             | 231 |
| 44 | Rechtsschutz gegen behördliche Warnung vor sog. Jugendsekten u. Psychogruppen. BVerfG, Nichtannahmebeschluss vom 6.12.2002 (1 BvR 1919/95) .....                                                                        | 237 |

|    |                                                                                                                                                                |     |
|----|----------------------------------------------------------------------------------------------------------------------------------------------------------------|-----|
| 45 | Kein Asylrecht eines Iraners wegen Übertritts zum christlichen Glauben. Sächsisches OVG, Urteil vom 10.12.2002 (A 2 B 771/02) . . . . .                        | 243 |
| 46 | Keine Befreiung von der allgemeinen Schulbesuchspflicht aus weltanschaulich-religiösen Gründen. BayVerfGH, Entscheidung vom 13.12.2002 (Vf.73-VI-01) . . . . . | 257 |
| 47 | Anspruch von Eltern auf nichtstaatlichen Weltanschauungsunterricht in Brandenburg. OVG Brandenburg, Beschluss vom 18.12.2002 (1 B 202/02) . . . . .            | 270 |
| 48 | Umfang der Belehrungspflicht des Steuerberaters betr. Kirchensteuer. OLG Düsseldorf, Urteil vom 20.12.2002 (23 U 39/02) . . . . .                              | 275 |
